# Supplementary material
Source: PubMed Central journal article supplement (PMC4954454)
Supplement: supp_2015-0324_Supplemental_Figures.pdf [file supp_2015-0324_Supplemental_Figures.pdf]

Supplemental Figures – Forrester et al.

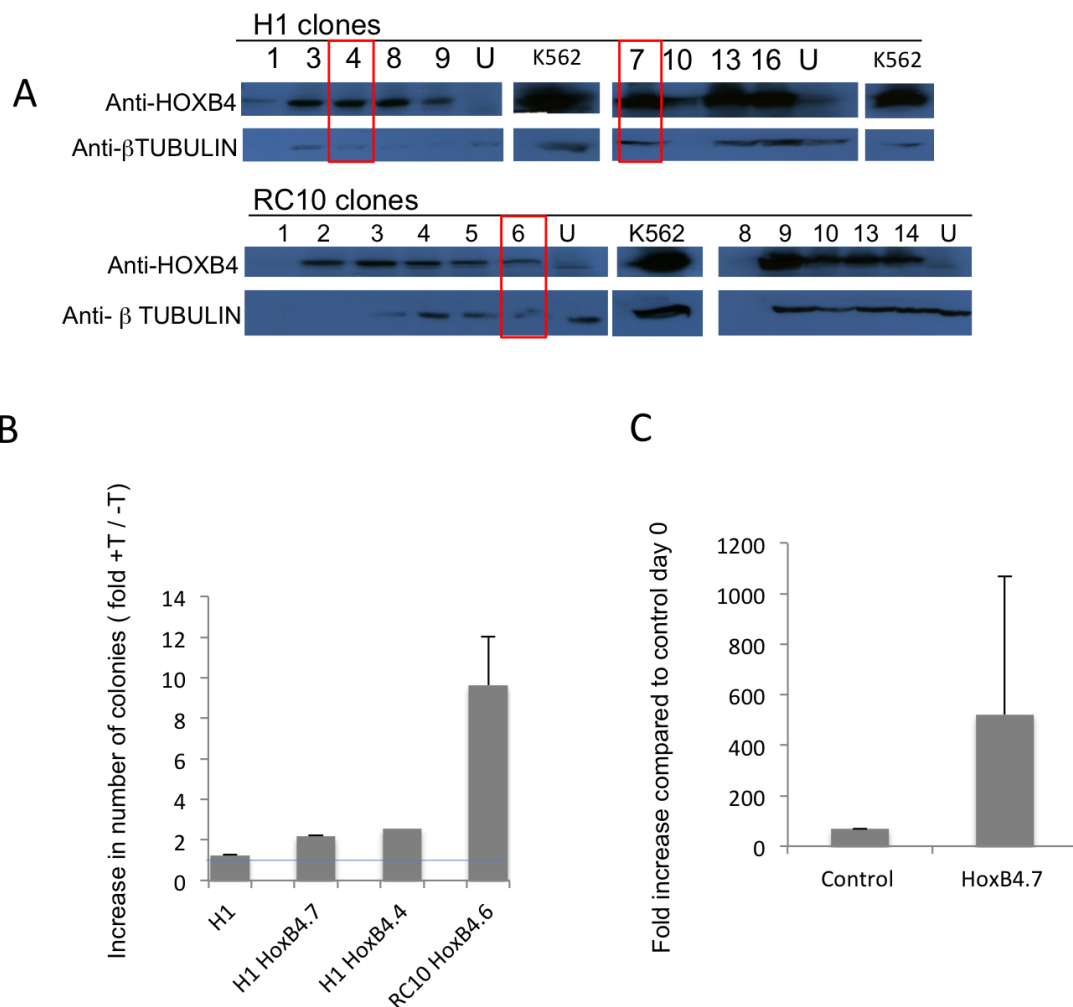

Supplementary Figure S1. hESC lines, H1 and RC10 (Roslin cells <http://roslinecells.com>) were transfected with the HOXB4-ERT<sup>2</sup> expression plasmid and drug-resistant transfectant clones were screened by Western blotting using an anti-HOXB4 and the loading control (anti-β-tubulin) antibodies (A). H1HOXB4.7, H1 HOXB4.4 and RC10HOXB4.6 were further screened for their potential to differentiate into haematopoietic progenitors using CFU-C assays (B). Clone H1HOXB4.7 was selected for further study as clone H1HoxB4.4, proliferated less well and RC10HOXB4.6 proliferated faster than controls. The hESC line HoxB4.7 demonstrated enhanced expression of HOXB4 compared to control cells at day 0 and later in the differentiation protocol at day 17 (C) and was used for further study.

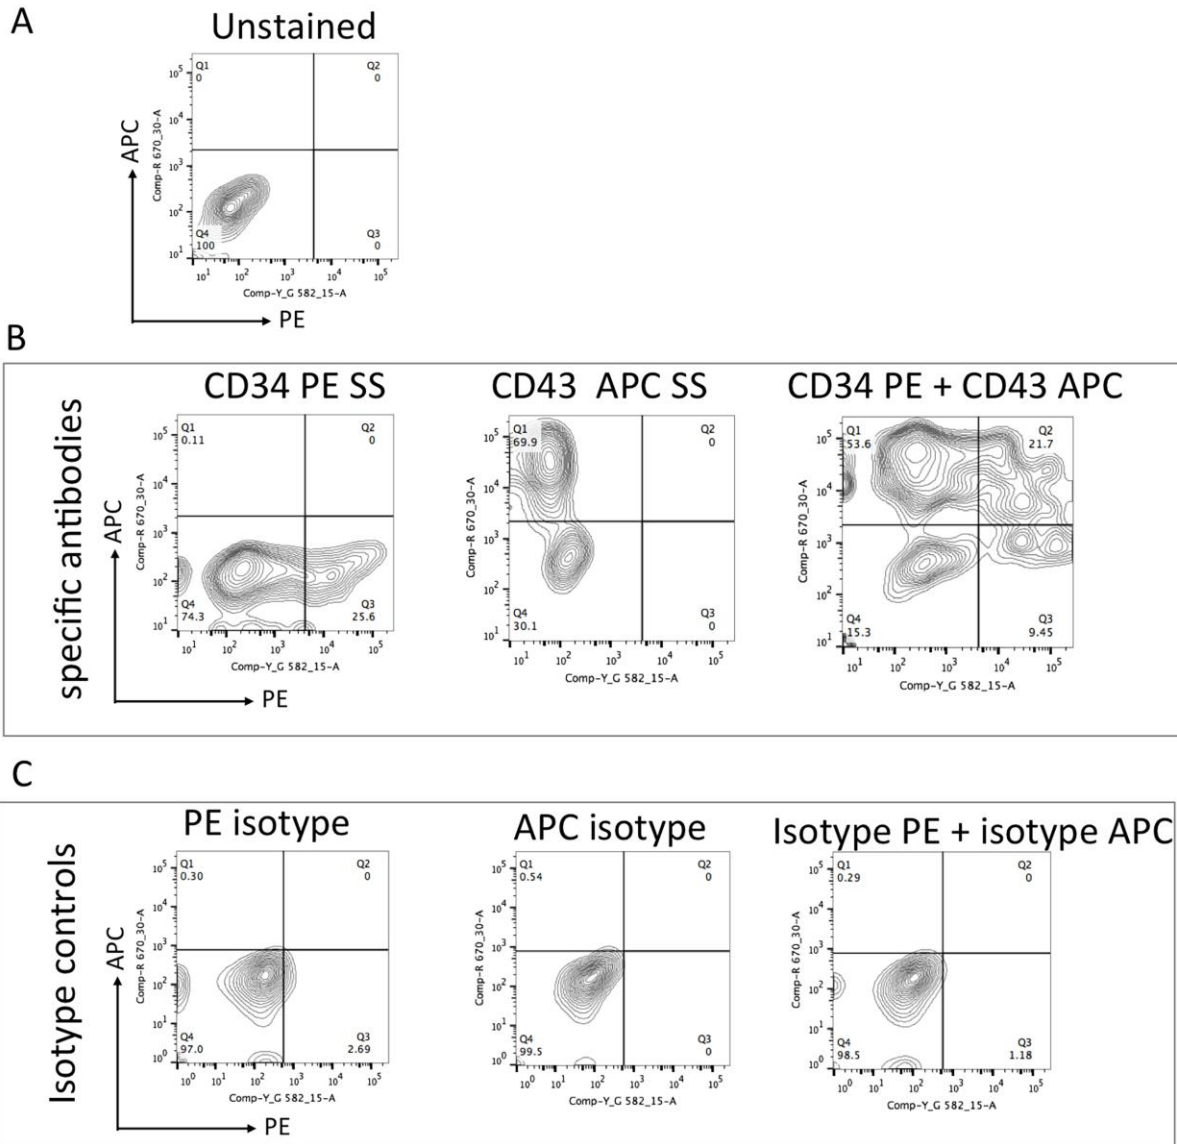

**Supplementary Figure S2. Isotype control antibody staining**

Day 10 differentiated hESCs were either unstained (A), stained with specific antibodies (B) or isotype controls (C) before flow cytometry analysis. No staining was observed with the isotype control antibodies.
